# Supplementary material for: Segmental duplications and evolutionary plasticity at tumor chromosome break-prone regions
Source: HighWire-hosted journal article supplement (doi:10.1101/gr.7010208), 2008-01-29
Supplement: supplement4.pdf [file supplement4.pdf]

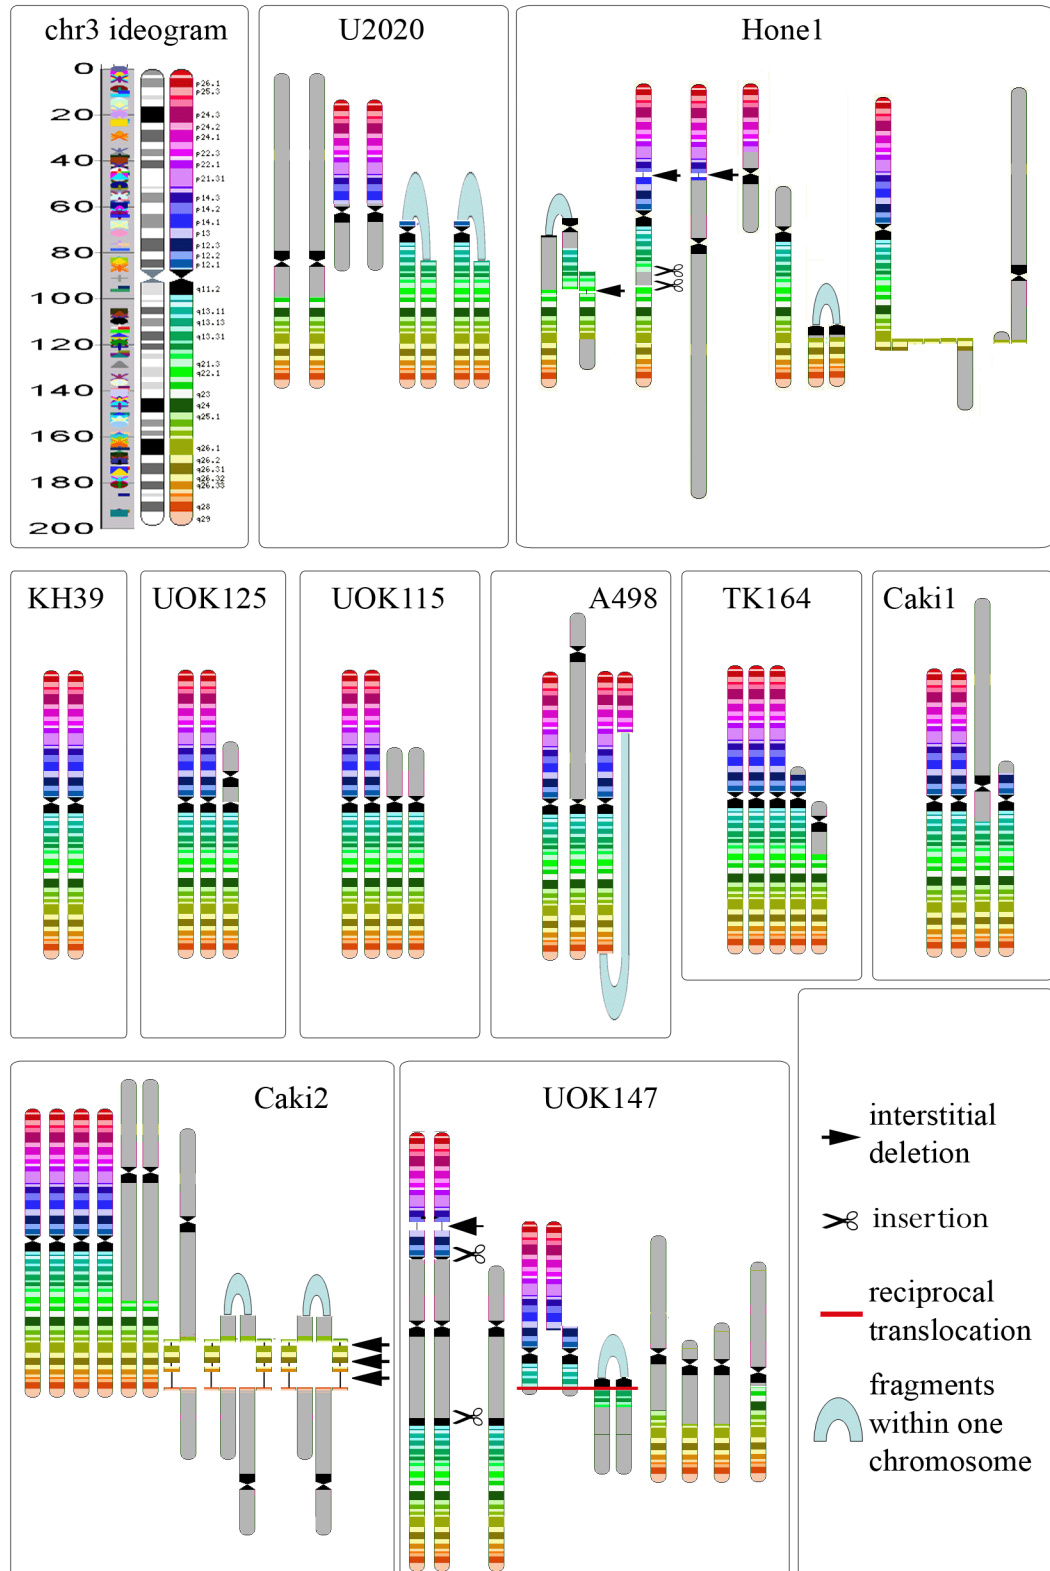

**Supplementary material 4. Chr3 breaks in 10 carcinoma cell lines by mpFISH.**  
 Left top box: Chr3 ideogram with Mb scale, distribution of mpFISH probes, banding and artificial color banding. Chr3 in the cell lines is shown according to the color banding, grey: parts of other chromosomes. Breaks were identified on the different marker chromosomes (if marker was duplicated, the breaks were counted on 1 chromosome). Translocation breaks are indicated as transition between chr3 part (color) and other chromosome part (grey); other breaks are indicated as shown in right bottom box.
