# Supplementary material for: Segmental duplications and evolutionary plasticity at tumor chromosome break-prone regions
Source: HighWire-hosted journal article supplement (doi:10.1101/gr.7010208), 2008-01-29
Supplement: supplement5.pdf [file supplement5.pdf]

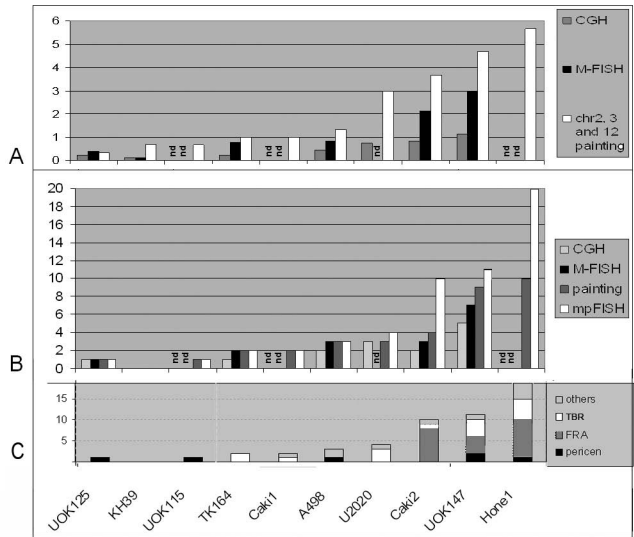

## Supplementary material 5. Chromosomal breaks in ten carcinoma cell lines.

A. Number of breaks per an average chromosome detected by metaphase CGH, multicolour karyotyping (M-FISH) and three chromosome specific painting probes (chr2, 3 and 12). "nd": not done.

B. Number of breaks per chr3 detected by metaphase CGH, M-FISH, chr3 painting and multipoint FISH (mpFISH). "nd": not done.

C. Number of breaks within pericentromeric region (pericen), fragile sites (FRA), newly identified tumor break-prone regions (TBR) and other sites (others).
